# Supplementary material for: Lignin–Inorganic Interfaces: Chemistry and Applications from Adsorbents to Catalysts and Energy Storage Materials
Source: PubMed Central journal article supplement (PMC7540583; doi:10.1002/cssc.202000216), 2020-04-17
Supplement: CSSC-13-4344-s001.pdf [file CSSC-13-4344-s001.pdf]

## **Author Contributions**

*T.B. Conceptualization: Equal; Visualization: Lead; Writing - Original Draft: Lead; Writing - Review & Editing: Equal*

*A.S. Conceptualization: Equal; Funding acquisition: Equal; Resources: Lead; Visualization: Lead; Writing - Original Draft: Equal; Writing - Review & Editing: Equal*

*M.S. Conceptualization: Lead; Funding acquisition: Supporting; Methodology: Equal; Project administration: Equal; Resources: Equal; Supervision: Lead; Visualization: Equal; Writing - Original Draft: Equal; Writing - Review & Editing: Lead.*
